# Supplementary material
Source: Springer Nature journal article supplement (https://www.springermedizin.de/resource/supplementary/12889_2010_2293_MOESM1_ESM.pdf/9485288)
Supplement: MOESM1 [file 9485288]

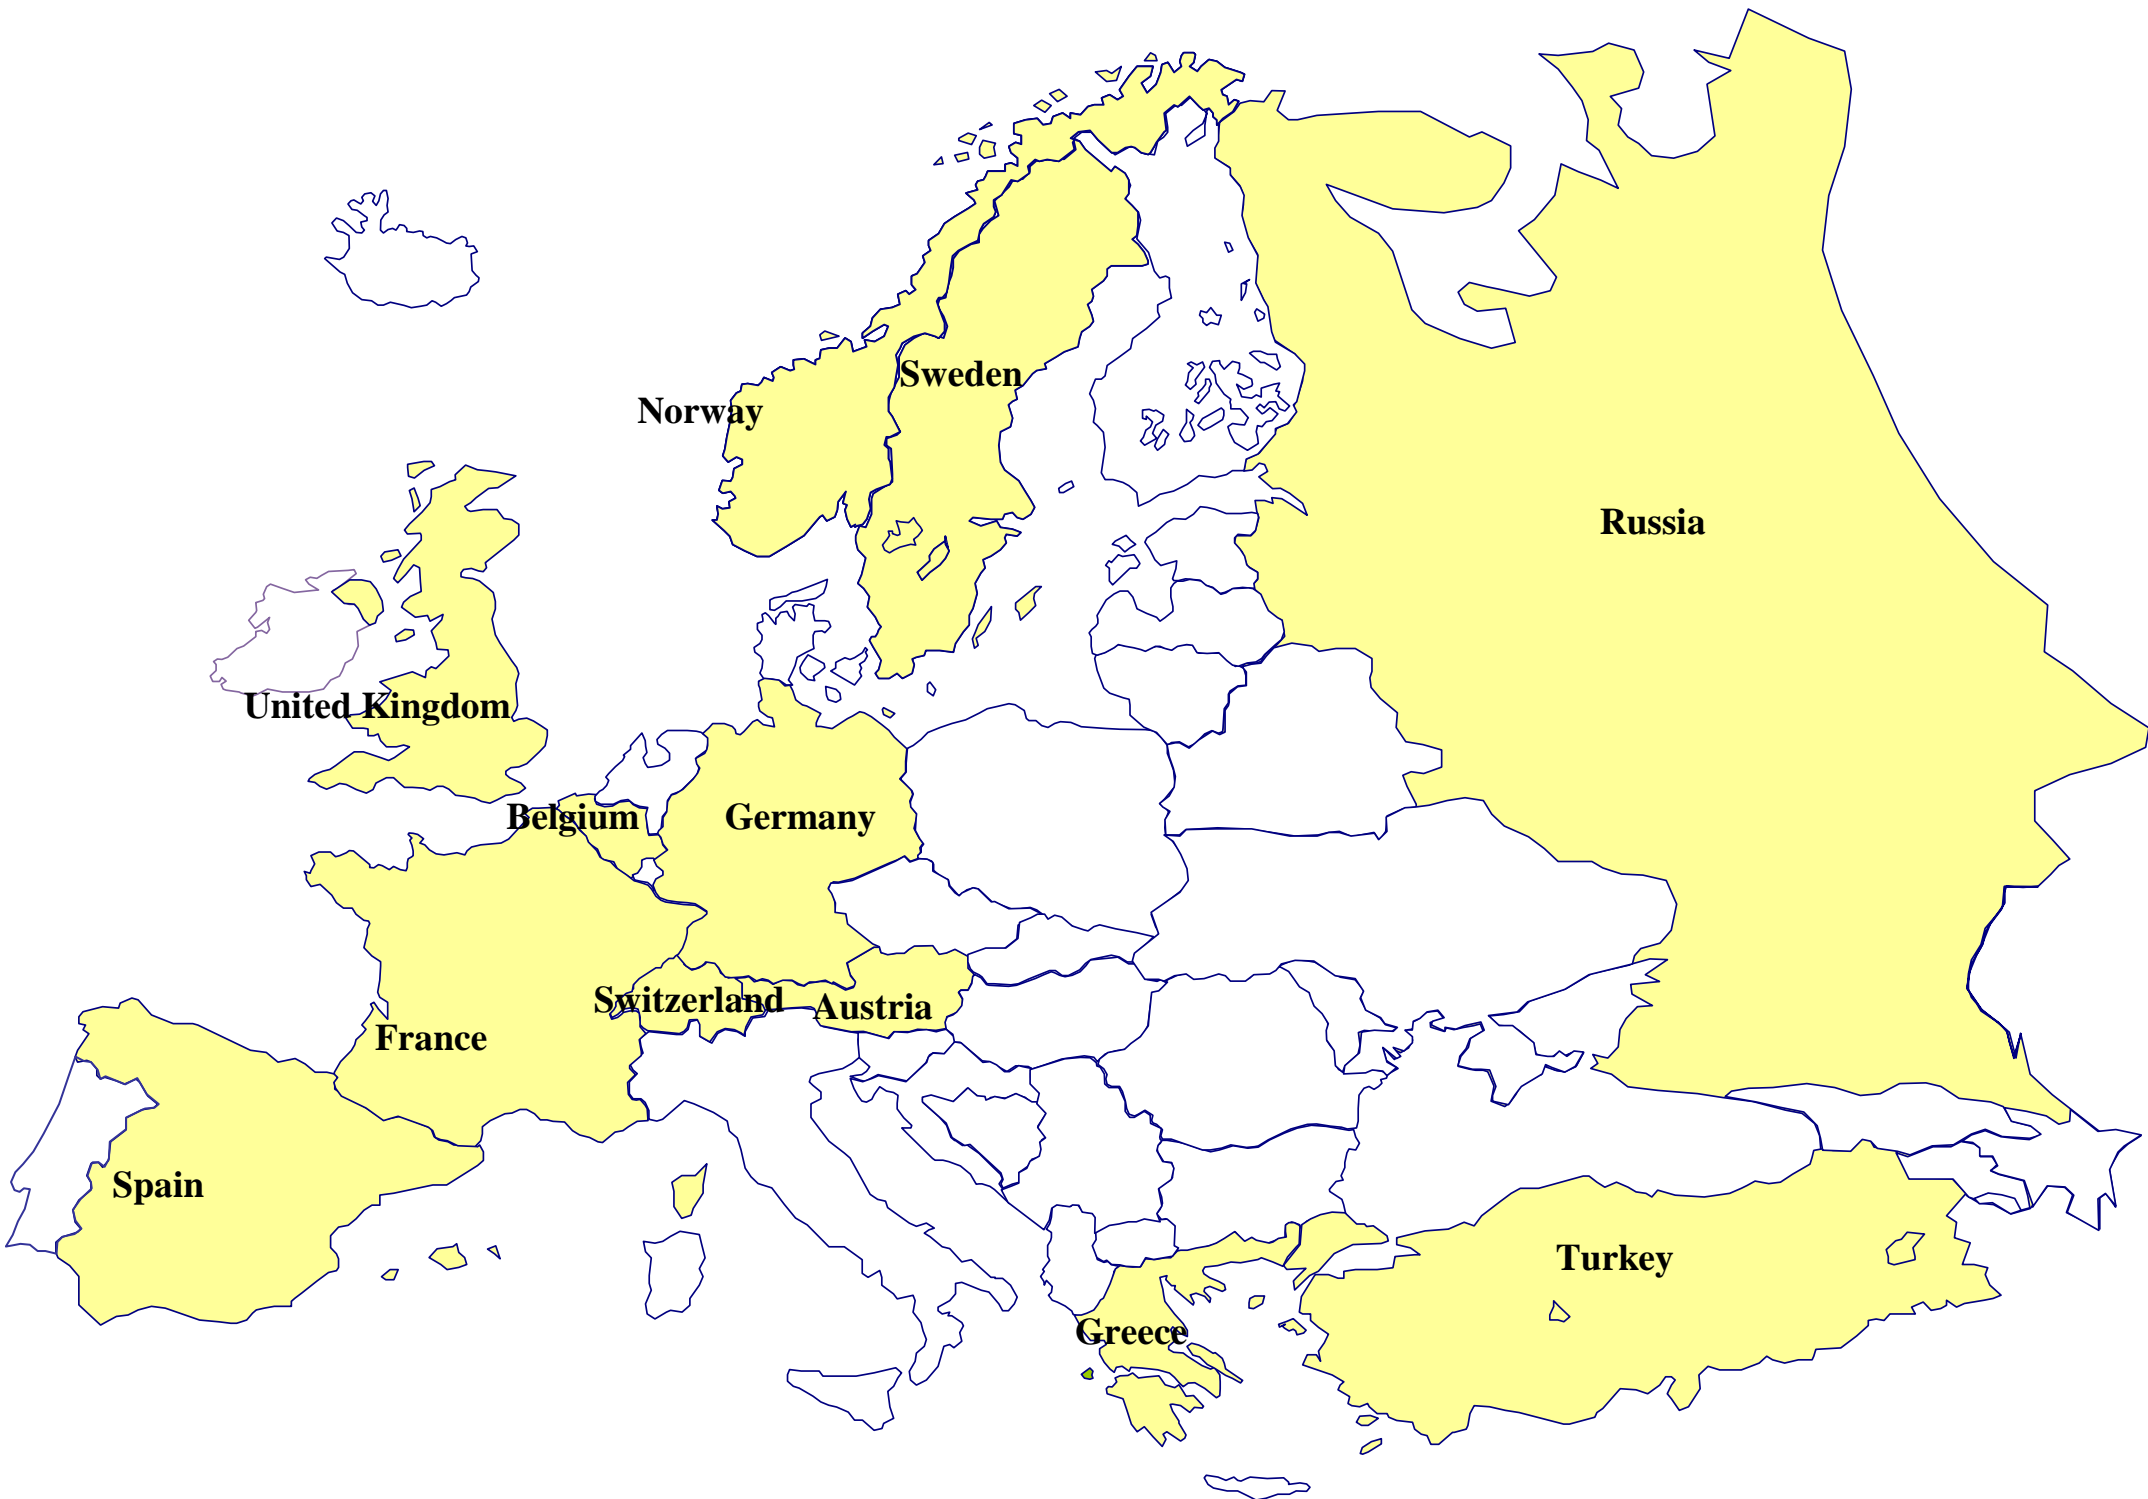

**United Kingdom**

**Norway**

**Sweden**

**Russia**

**Belgium**

**Germany**

**France**

**Switzerland**

**Austria**

**Spain**

**Greece**

**Turkey**
